# Supplementary material for: Improved hydrogen evolution performance by engineering bimetallic AuPd loaded on amino and nitrogen functionalized mesoporous hollow carbon spheres
Source: Royal Society of Chemistry journal article supplement (doi:10.1039/d2ra01191c), 2022-01-01
Supplement: d2ra01191c1.pdf [file d2ra01191c1.pdf]

## Supplementary Information

### **Improved Hydrogen Evolution Performance by Engineering Bimetallic AuPd Loaded on Amino and Nitrogen Functionalized Mesoporous Hollow Carbon Spheres**

Lenan Wang<sup>a,b</sup>, Zhankui Zhao<sup>a</sup>, Hongli Wang<sup>a,\*</sup>, Yue Chi<sup>a,b,\*</sup>

<sup>a</sup>College of Material Science and Engineering, Key Laboratory of Advanced Structural Materials, Ministry of Education, Changchun University of Technology, Changchun, 130012, China. E-mail: yuechi@ccut.edu.cn, wanghongli@ccut.edu.cn

<sup>b</sup>Advanced Institute of Materials Science, Changchun University of Technology, Changchun, 130012, China. E-mail: yuechi@ccut.edu.cn

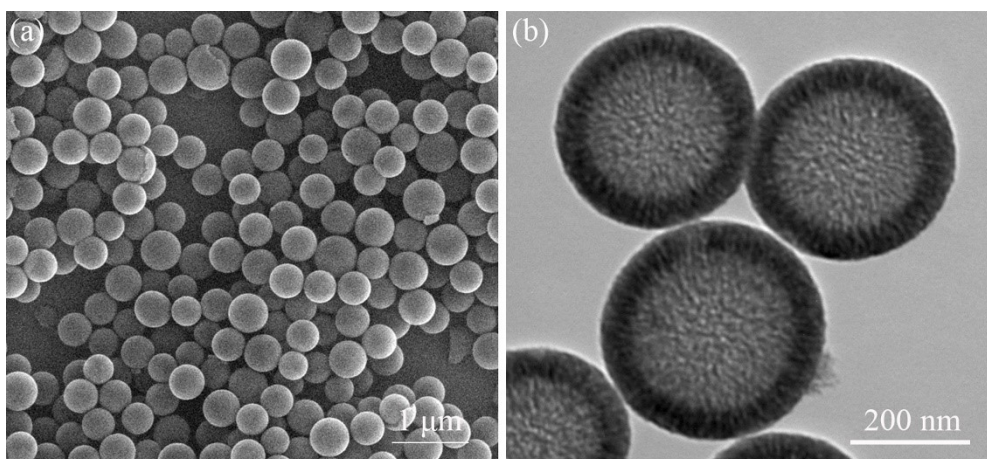

**Fig. S1.** SEM image (a) and TEM image of HMCS (b).

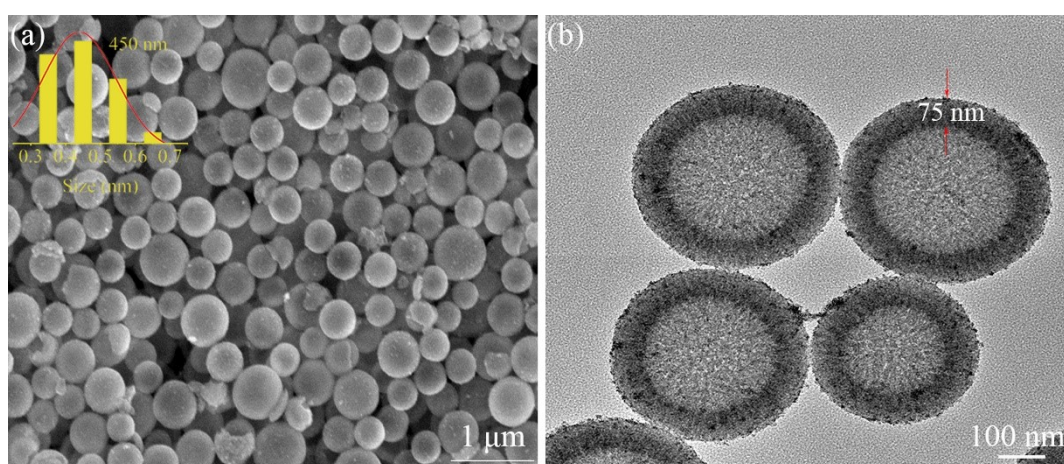

**Fig. S2.** SEM image(a) and TEM image(b) of Au<sub>0.3</sub>Pd<sub>0.7</sub>/NH<sub>2</sub>-N-HMCS.

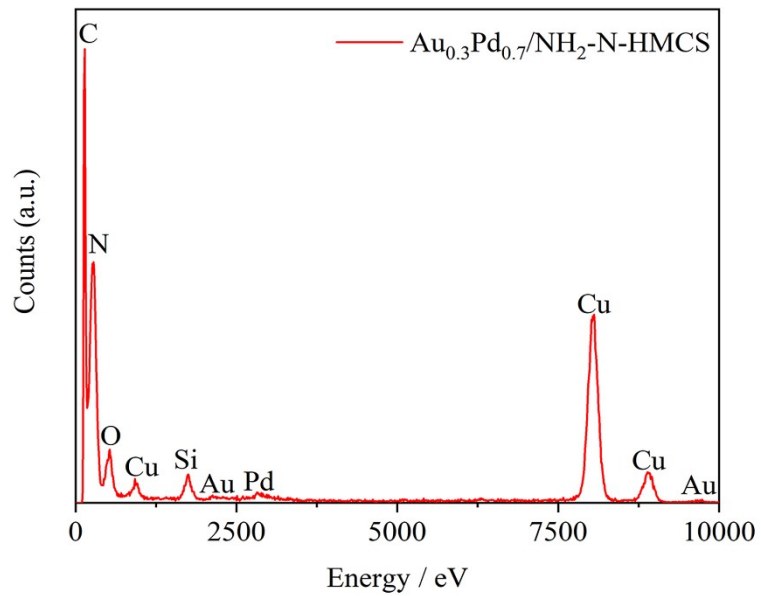

**Fig. S3.** EDX spectrum of  $\text{Au}_{0.3}\text{Pd}_{0.7}/\text{NH}_2\text{-N-HMCS}$

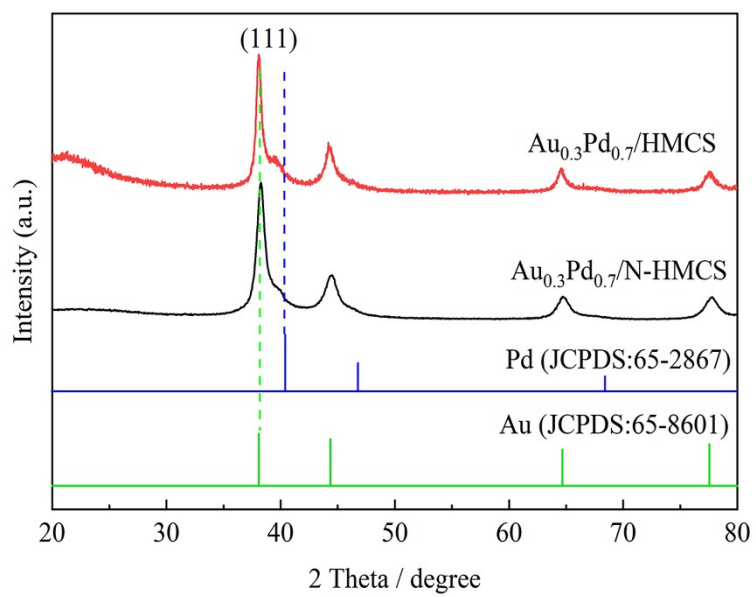

**Fig. S4.** The XRD patterns of  $\text{Au}_{0.3}\text{Pd}_{0.7}/\text{HMCS}$  and  $\text{Au}_{0.3}\text{Pd}_{0.7}/\text{N-HMCS}$ .

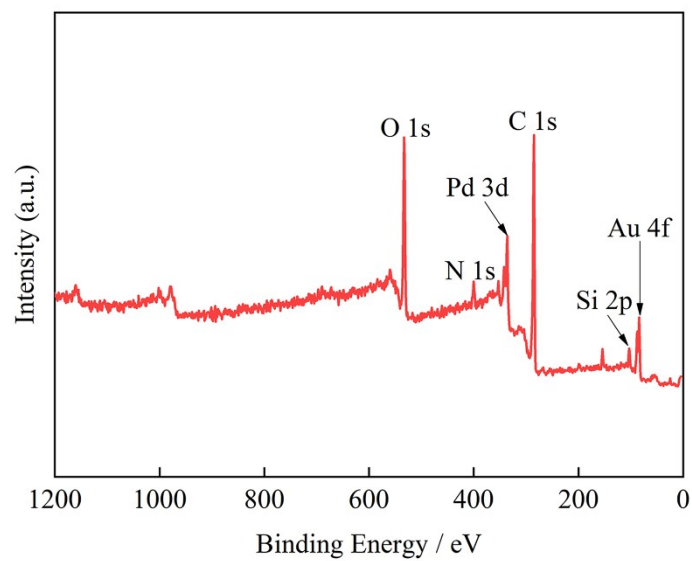

**Fig. S5.** The XPS spectrum of  $\text{Au}_{0.3}\text{Pd}_{0.7}/\text{NH}_2\text{-N-HMCS}$ .

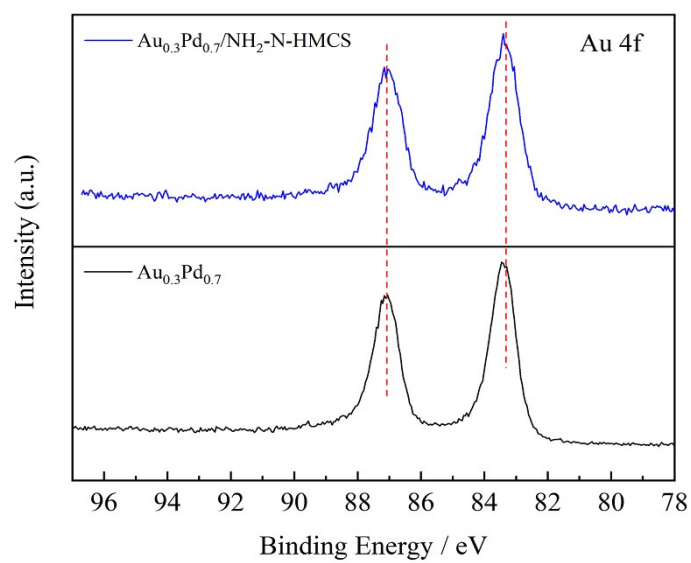

**Fig. S6.** The high-resolution XPS spectra of Au 4f for  $\text{Au}_{0.3}\text{Pd}_{0.7}/\text{NH}_2\text{-N-HMCS}$ .

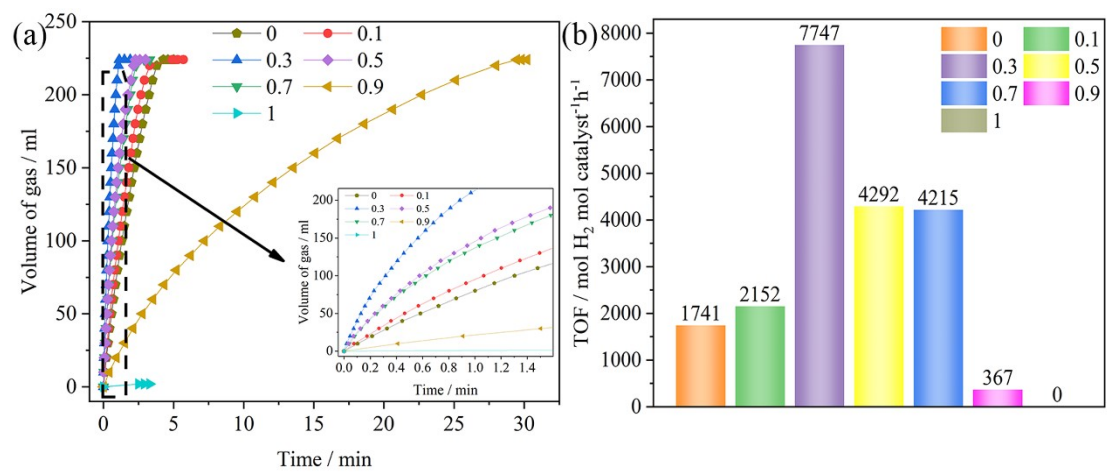

**Fig. S7.** Time-course plots for the dehydrogenation of FA (1.0 M, 5.0 mL) catalyze by Au<sub>x</sub>Pd<sub>1-x</sub>/NH<sub>2</sub>-N-HMCS (x= 0, 0.1, 0.3, 0.5, 0.7, 0.9 and 1) at 298 K (a) and the related initial TOF values (b).

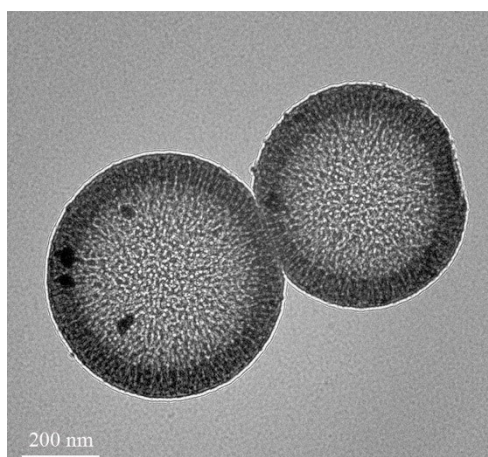

**Fig. S8.** TEM image of Au<sub>0.3</sub>Pd<sub>0.7</sub>/HMCS.

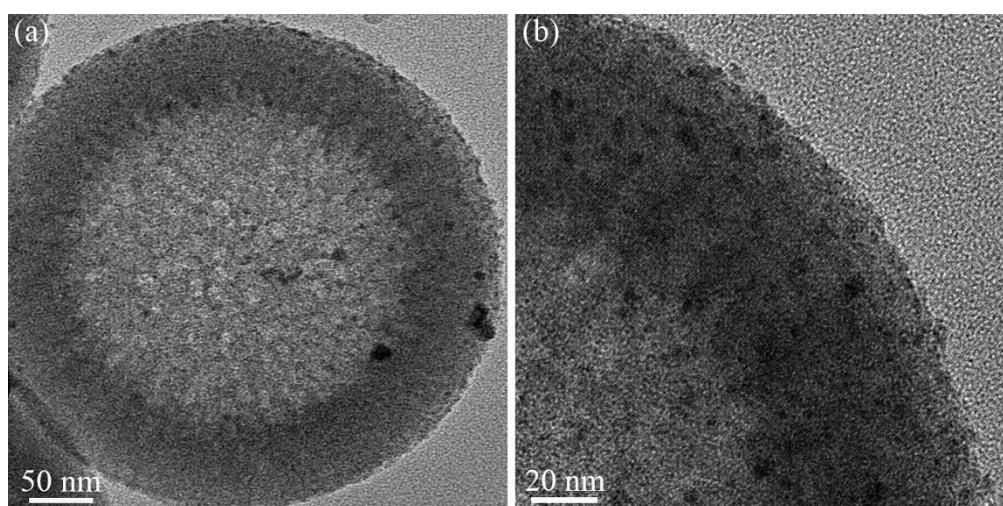

**Fig. S9.** TEM images of Au<sub>0.3</sub>Pd<sub>0.7</sub>/N-HMCS.

**Table S1.** Comparisons of catalytic activities for the dehydrogenation of FA catalyzed by previously reported heterogeneous catalysts with the as-synthesized Au<sub>0.3</sub>Pd<sub>0.7</sub>/NH<sub>2</sub>-N-HMCS in this work.

| Catalyst                                                     | Temp.<br>(K) | Additive | TOF (h <sup>-1</sup> ) | Ref       |
|--------------------------------------------------------------|--------------|----------|------------------------|-----------|
| Au@Pd/UiO-66(Zr <sub>85</sub> Ti <sub>15</sub> )             | 303          | None     | 200                    | 3         |
| Pd/CN <sub>0.25</sub>                                        | 298          | None     | 752                    | 17        |
| Au <sub>1</sub> Pd <sub>1.5</sub> /MIL-101-NH <sub>2</sub>   | 298          | None     | 526                    | 40        |
| NiPd/NH <sub>2</sub> -N-rGO                                  | 298          | None     | 954.3                  | 33        |
| Au <sub>0.75</sub> Pd <sub>0.25</sub> /C-L-7.5               | 298          | HCOONa   | 718                    | 11        |
| Pd/S-1-in-K                                                  | 298          | HCOONa   | 856                    | 9         |
| (Co <sub>6</sub> )Ag <sub>0.1</sub> Pd <sub>0.9</sub> /RGO   | 323          | HCOONa   | 2739                   | 41        |
| Au <sub>2</sub> Pd <sub>3</sub> @(P)N-C                      | 303          | HCOONa   | 5400                   | 6         |
| Au <sub>0.3</sub> Pd <sub>0.7</sub> /NH <sub>2</sub> -N-HMCS | 298          | None     | 7747                   | This work |



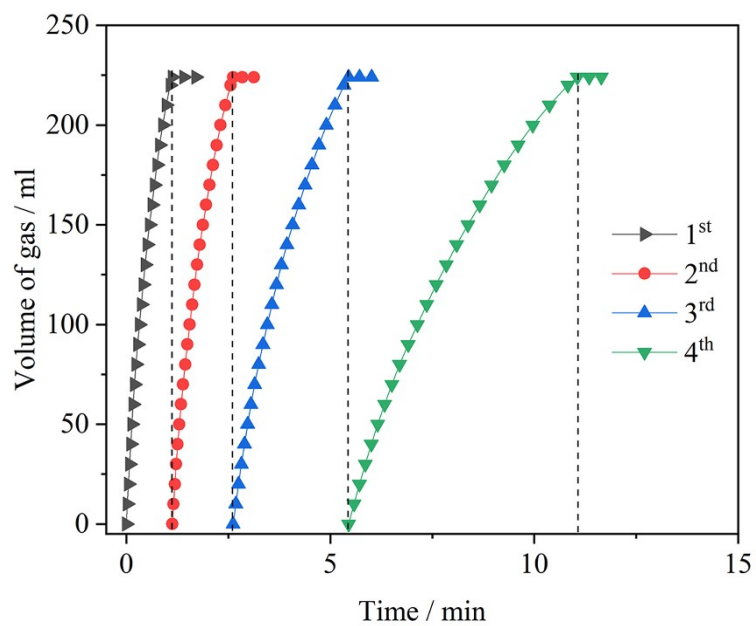

**Fig. S10.** Durability test of  $\text{Au}_{0.3}\text{Pd}_{0.7}/\text{NH}_2\text{-N-HMCS}$  towards the dehydrogenation of FA.

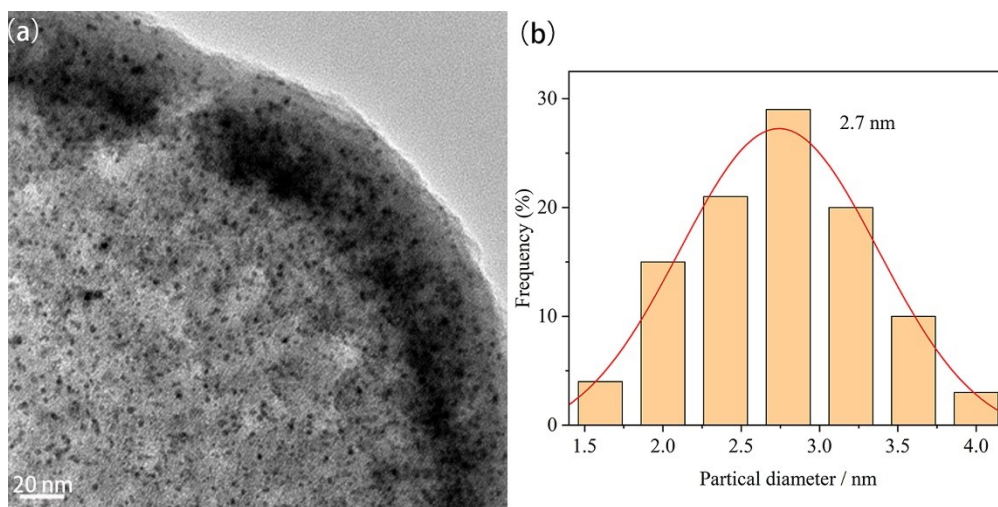

**Fig. S11.** (a) TEM image and (b) the corresponding particle size distribution of  $\text{Au}_{0.3}\text{Pd}_{0.7}/\text{NH}_2\text{-N-HMCS}$  after the 4<sup>th</sup> run.
